# Supplementary material for: Novel tau filament fold in chronic traumatic encephalopathy encloses hydrophobic molecules
Source: Springer Nature journal article supplement (doi:10.1038/s41586-019-1026-5), 2019-03-20

In the format provided by the authors and unedited.

# Novel tau filament fold in chronic traumatic encephalopathy encloses hydrophobic molecules

Benjamin Falcon<sup>1</sup>, Jasenko Zivanov<sup>1</sup>, Wenjuan Zhang<sup>1</sup>, Alexey G. Murzin<sup>1</sup>, Holly J. Garringer<sup>2</sup>, Ruben Vidal<sup>2</sup>, R. Anthony Crowther<sup>1</sup>, Kathy L. Newell<sup>3</sup>, Bernardino Ghetti<sup>2</sup>, Michel Goedert<sup>1,4\*</sup> & Sjors H. W. Scheres<sup>1,4\*</sup>

<sup>1</sup>MRC Laboratory of Molecular Biology, Cambridge, UK. <sup>2</sup>Department of Pathology and Laboratory Medicine, Indiana University School of Medicine, Indianapolis, IN, USA. <sup>3</sup>Department of Pathology and Laboratory Medicine, University of Kansas School of Medicine, Kansas City, KS, USA. <sup>4</sup>These authors jointly supervised this work: Michel Goedert, Sjors H. W. Scheres. \*e-mail: [mg@mrc-lmb.cam.ac.uk](mailto:mg@mrc-lmb.cam.ac.uk); [scheres@mrc-lmb.cam.ac.uk](mailto:scheres@mrc-lmb.cam.ac.uk)

Ext. Data Fig. 1d

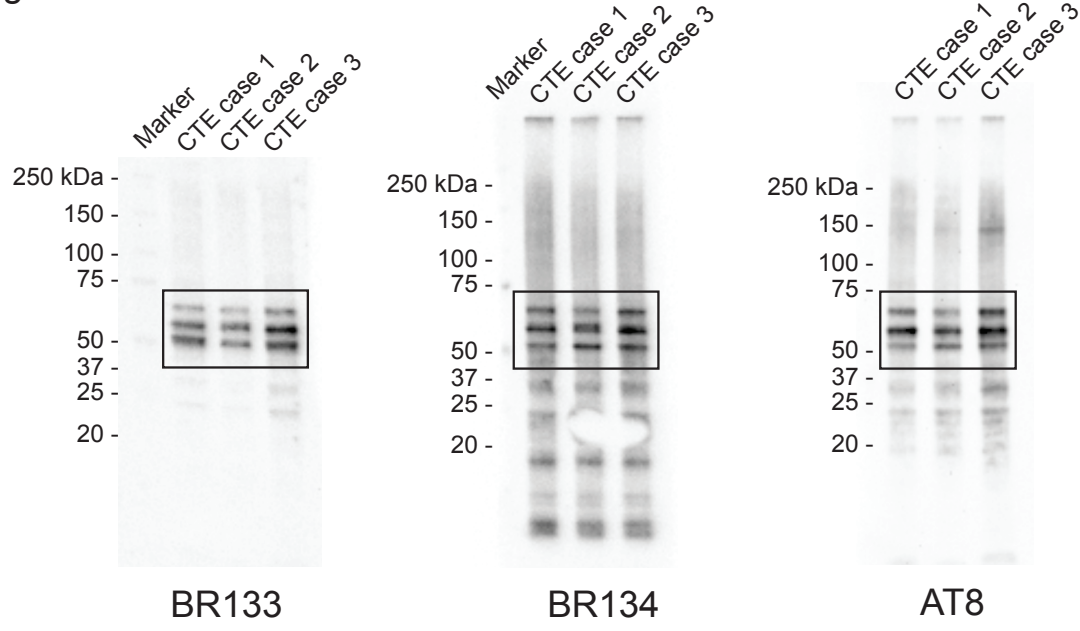

Ext. Data Fig. 2a

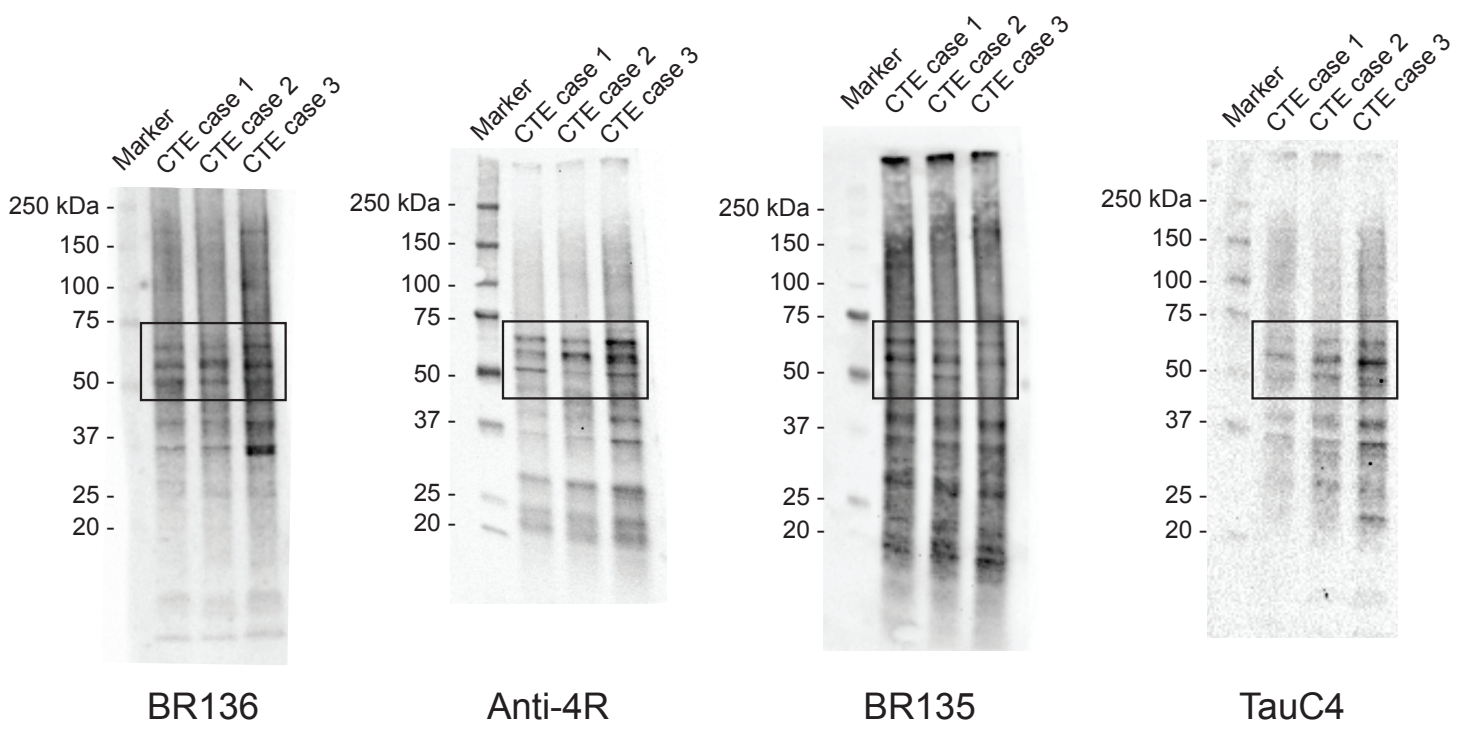

Supplement: 41586_2019_1026_MOESM1_ESM.pdf [file 41586_2019_1026_MOESM1_ESM.pdf]
